# Supplementary material
Source: HighWire-hosted journal article supplement (https://bmjopen.bmj.com/content/8/1/e017578)
Supplement: inline-supplementary-material-1 [file inline-supplementary-material-1.pdf]

Appendix A

Database(s): **Ovid MEDLINE(R)** 1946 to January Week 4 2017, **Ovid MEDLINE(R) In-Process & Other Non-Indexed**

**Citations** February 06, 2017

Search Strategy:

| #  | Searches                                                                                                                                                          |
|----|-------------------------------------------------------------------------------------------------------------------------------------------------------------------|
| 1  | ((bio* or serum* or serol*) adj4 (mark* or indicator* or characteristic* or factor*)).tw,hw,fs,sh,kw,ot.                                                          |
| 2  | (biomark* or bio*-mark*).tw,hw,sh,fs,kw,ot.                                                                                                                       |
| 3  | (bio* adj3 mark*).tw,hw,sh,fs,kw,ot.                                                                                                                              |
| 4  | exp Biomarkers/ or "intercellular signaling peptides and proteins"/ or cytokines/ or Biological Factors/                                                          |
| 5  | exp Neoplasms/                                                                                                                                                    |
| 6  | (cancer* or neoplas* or tu?mor* or malignan* or carcinoma* or malignocarcinoma* or maligno-carcinoma* or metast* or adenocarci* or adenom*).ti,ab,sh,fs,kw,ot,hw. |
| 7  | brain/ or neural pathways/                                                                                                                                        |
| 8  | (neurocognit* or neuro-cognit* or cognit*).tw,hw,sh,fs,kw,ot.                                                                                                     |
| 9  | exp Cognition/ or cognitive science/ or cognitive neuroscience/ or exp Mental Processes/                                                                          |
| 10 | ((neuro-cognit* or cognit* or neurocognit* or neural) adj4 (function* or activit* or process*)).tw,hw,sh,fs,kw,ot.                                                |
| 11 | ((thought* or think* or memory or attention or reason* or language* or focus*) adj3 (process* or activit* or function*)).tw,hw,sh,fs,kw,ot.                       |
| 12 | (neural adj3 function*).tw,hw,sh,fs,kw,ot.                                                                                                                        |
| 13 | Attention/ or learning/ or memory/ or memory, long-term/ or memory consolidation/ or memory, short-term/ or mental recall/ or Thinking/                           |
| 14 | blood/ or exp serum/                                                                                                                                              |
| 15 | (blood* or serum* or plasma* or serolog*).tw,sh,fs,hw,kw,ot.                                                                                                      |
| 16 | exp Animals/ not (Humans/ and exp Animals/)                                                                                                                       |
| 17 | or/1-4 [Biomarkers MeSH and textwords]                                                                                                                            |
| 18 | or/5-6 [Neoplasms]                                                                                                                                                |
| 19 | or/7-13 [Cognitive function]                                                                                                                                      |
| 20 | or/14-15 [Blood]                                                                                                                                                  |
| 21 | 17 and 18 and 19 and 20                                                                                                                                           |
| 22 | 21 not 16                                                                                                                                                         |
| 23 | limit 24 to (english language and yr="2006 - 2017")                                                                                                               |
